# Supplementary material for: Structure and stability of the Human respiratory syncytial virus M2–1 RNA-binding core domain reveals a compact and cooperative folding unit
Source: PubMed Central journal article supplement (PMC5947689; doi:10.1107/s2053230x17017381), 2017-12-15
Supplement: f-74-00023-sup1.pdf [file f-74-00023-sup1.pdf]

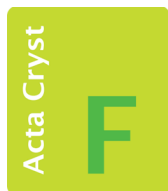

STRUCTURAL BIOLOGY  
COMMUNICATIONS

**Volume 74 (2018)**

**Supporting information for article:**

**Structure and stability of the *Human respiratory syncytial virus* M<sub>2-1</sub> RNA-binding core domain reveals a compact and cooperative folding unit**

**Ivana G. Molina, Inokentijs Josts, Yasser Almeida Hernandez, Sebastian Esperante, Mariano Salgueiro, Maria M. Garcia Alai, Gonzalo de Prat-Gay and Henning Tidow**

**Supplementary Figure S1**

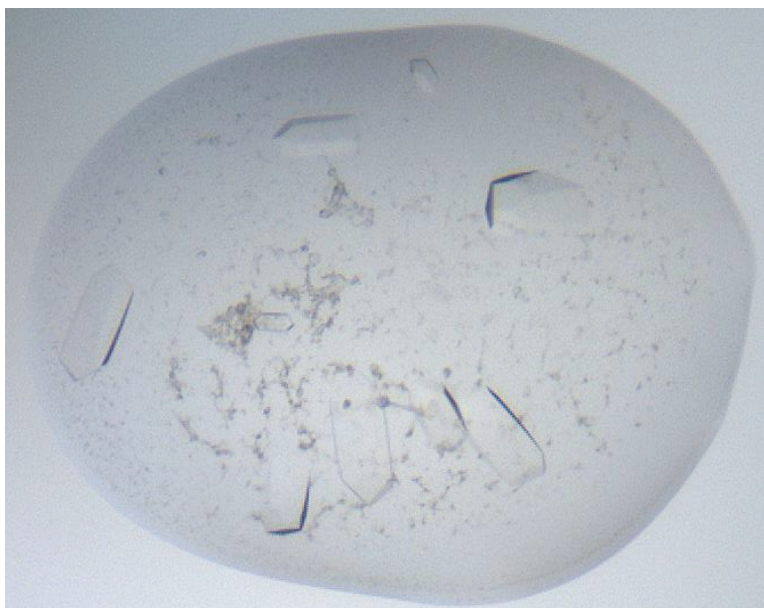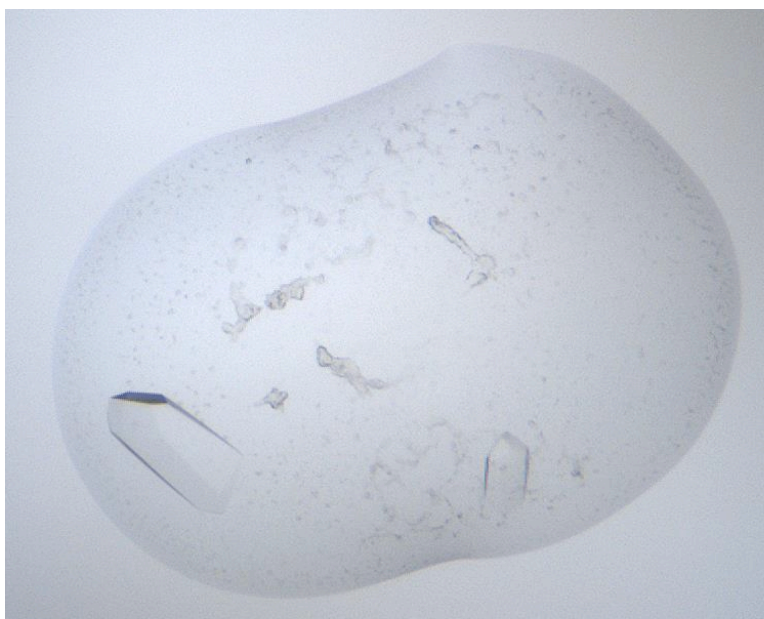

Representative crystals used for structure determination.

## Supplementary Figure S2

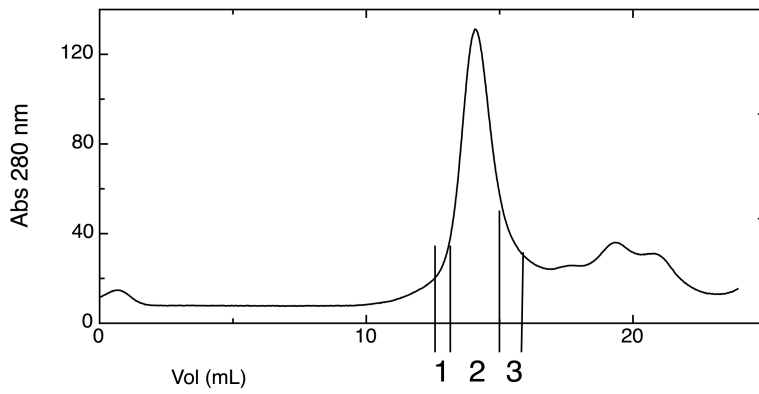

Size-exclusion chromatography (S75) profile of M<sub>2-1</sub> RBD after proteolytic cleavage of full-length M<sub>2-1</sub>. The molecular weight of the protein was 13.6 kDa.

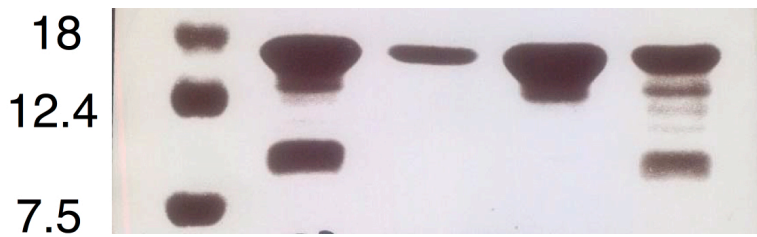

SDS-PAGE analysis of selected fractions of the size-exclusion chromatography.
